# Supplementary material for: Tuning the selectivity of benzylamine photo-oxidation with different rhodium modes anchored on BiOIO3
Source: Royal Society of Chemistry journal article supplement (doi:10.1039/d3ta01804k), 2023-01-01
Supplement: d3ta01804k1.pdf [file d3ta01804k1.pdf]

## Supporting Information for

### Tuning the Selectivity of Benzylamine Photo-oxidation with Different Rhodium Modes Anchoring on BiOIO<sub>3</sub>

Jiaping Liu,<sup>‡a</sup> Yan Wu,<sup>‡a</sup> Qingqing Chen,<sup>‡a</sup> Rui Yu,<sup>a</sup> Keqing Shi,<sup>b</sup> Tao Jing,<sup>d</sup>

Zhujie Li,<sup>b\*</sup> Zaizhu Lou,<sup>c\*</sup> and Gang Wang<sup>a\*</sup>

## Figs and Tables

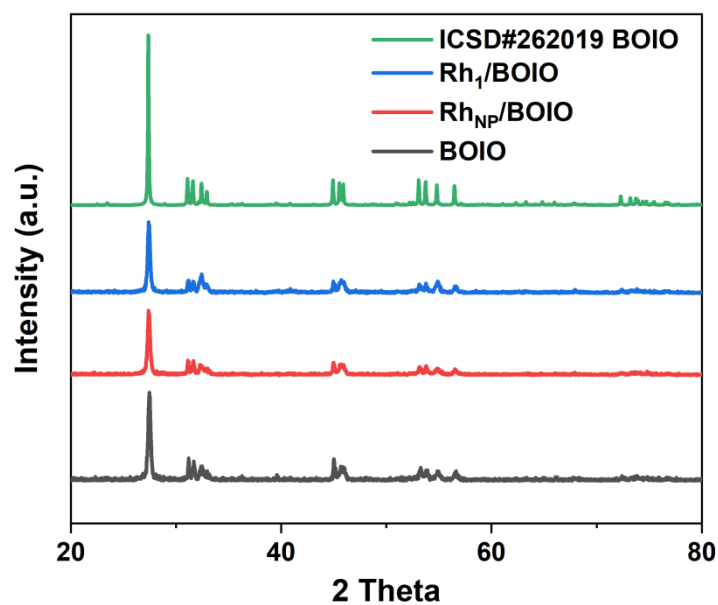

**Fig. S1** XRD patterns of the Rh<sub>1</sub>/BOIO, Rh<sub>NP</sub>/BOIO, BOIO and the standard BOIO.

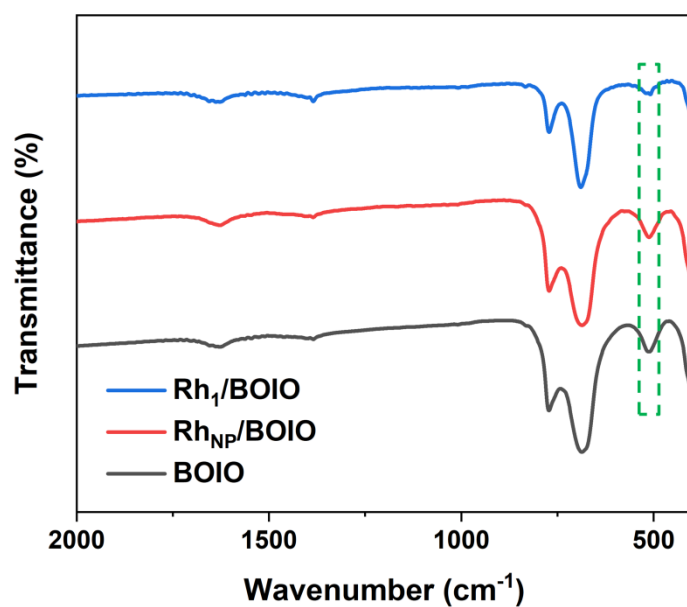

**Fig. S2** The Fourier transforms infrared spectroscopy (FT-IR) of samples. The peak at around 514 cm<sup>-1</sup> is the stretching vibration of Bi-O of BOIO (green box). In Rh<sub>1</sub>/BOIO, the characteristic peak of Bi-O has been reduced, which could attribute to the formation of Rh-O bond.

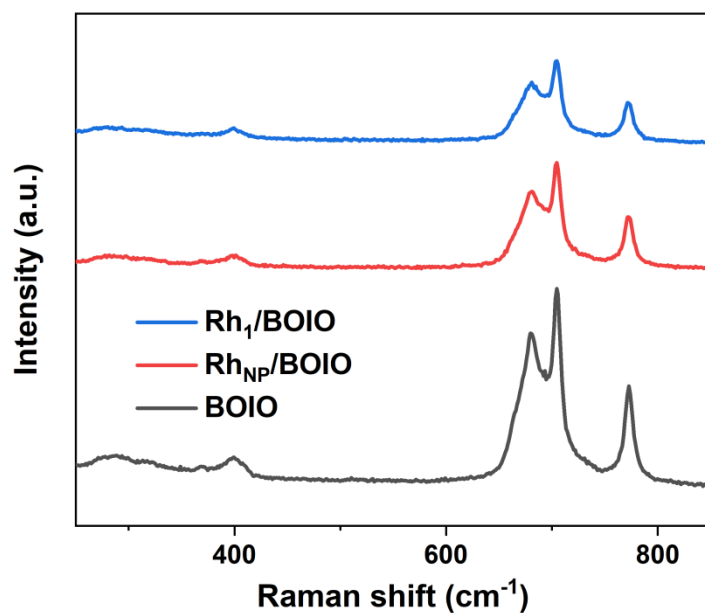

Fig. S3 The Raman spectra of Rh<sub>1</sub>/BOIO, Rh<sub>NP</sub>/BOIO and BOIO.

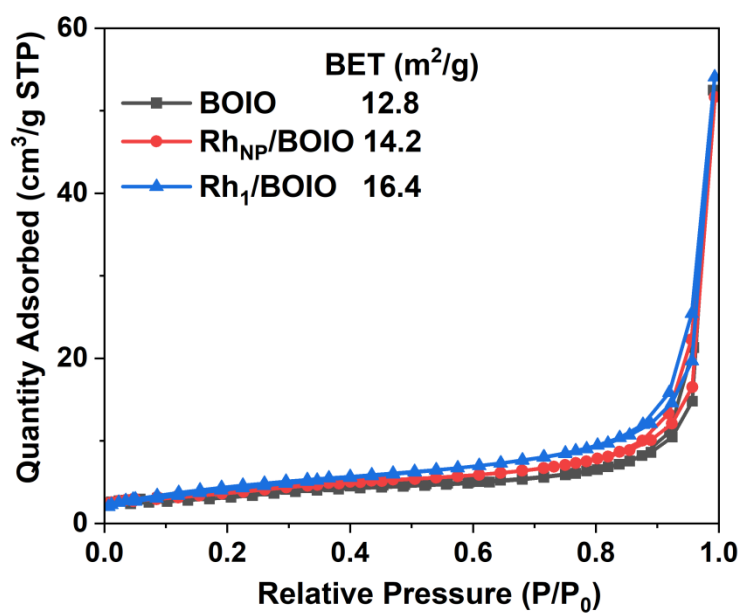

Fig. S4 Nitrogen adsorption and desorption isotherms of Rh<sub>1</sub>/BOIO, Rh<sub>NP</sub>/BOIO and BOIO.

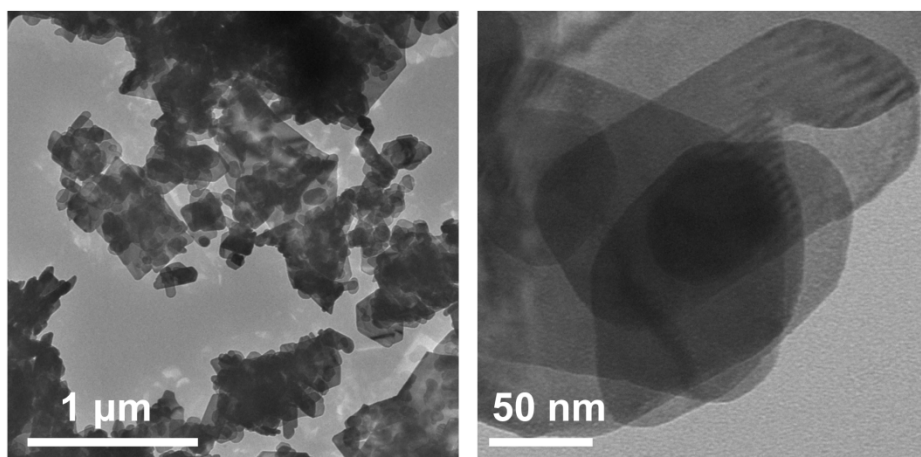

**Fig. S5** TEM images of BOIO.

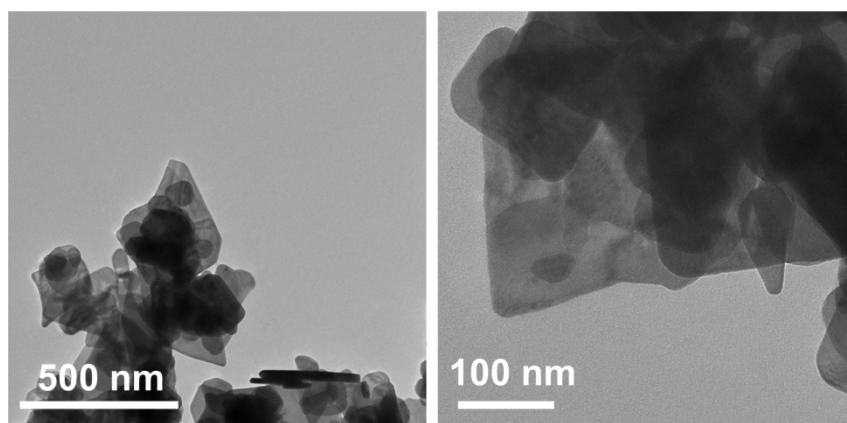

**Fig. S6** TEM images of Rh<sub>1</sub>/BOIO.

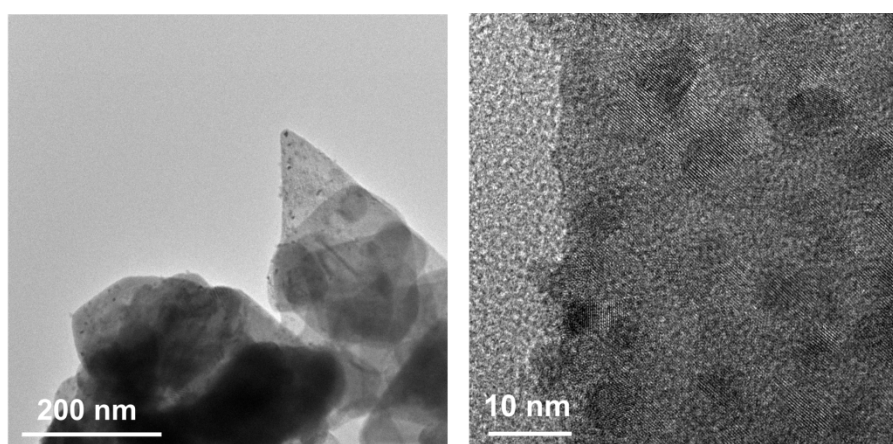

**Fig. S7** TEM images of Rh<sub>NP</sub>/BOIO.

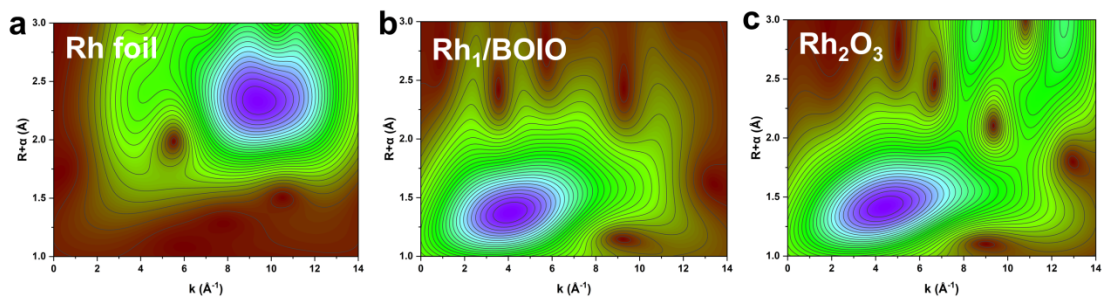

**Fig. S8** WT plots of samples. (a) Rh foil, (b)  $\text{Rh}_1/\text{BOIO}$  and (c)  $\text{Rh}_2\text{O}_3$ .

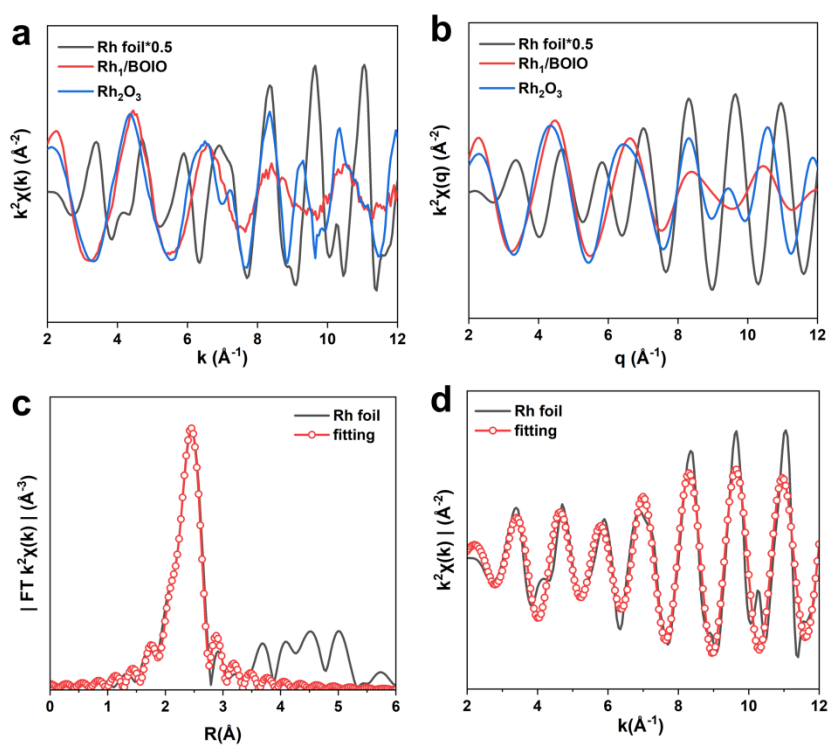

**Fig. S9** (a) The  $k$ -space spectra of EXAFS of Rh foil,  $\text{Rh}_2\text{O}_3$  and  $\text{Rh}_1/\text{BOIO}$ . (b) The  $q$ -space spectra of EXAFS of Rh foil,  $\text{Rh}_2\text{O}_3$  and  $\text{Rh}_1/\text{BOIO}$ . (c)  $R$ -space fitting results of Rh foil. (d)  $k$ -space fitting results of Rh foil.

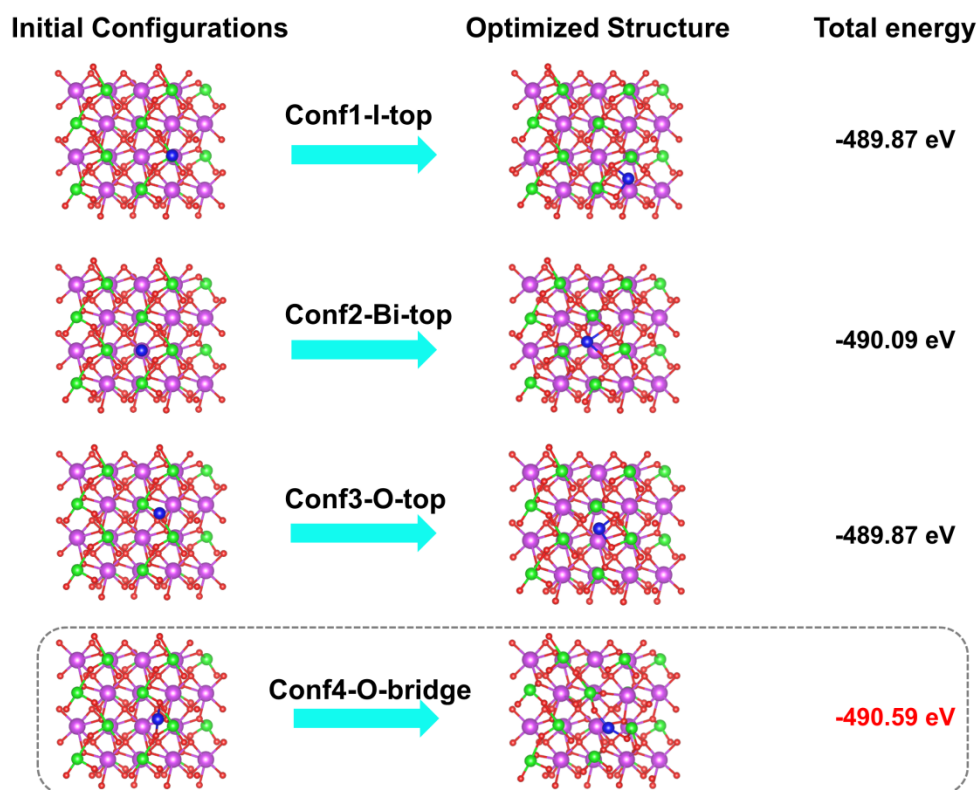

**Fig. S10** The optimized structure of  $\text{Rh}_1/\text{BOIO}$ . These are four different initial configurations have been established, Conf1-I-top, Conf2-Bi-top, Conf3-O-top and Conf4-O-bridge. The most stable configuration of Conf4-O-bridge can be confirmed after structural optimization. purple ball: Bi, green ball: I, red ball: O, blue ball: Rh.

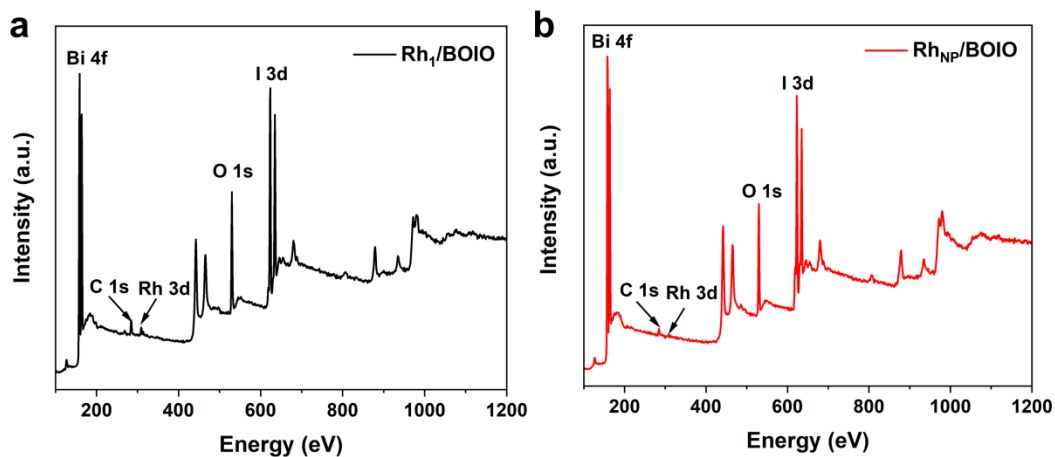

Fig. S11 XPS survey spectrum of the as-prepared (a) Rh<sub>1</sub>/BOIO and (b) Rh<sub>NP</sub>/BOIO.

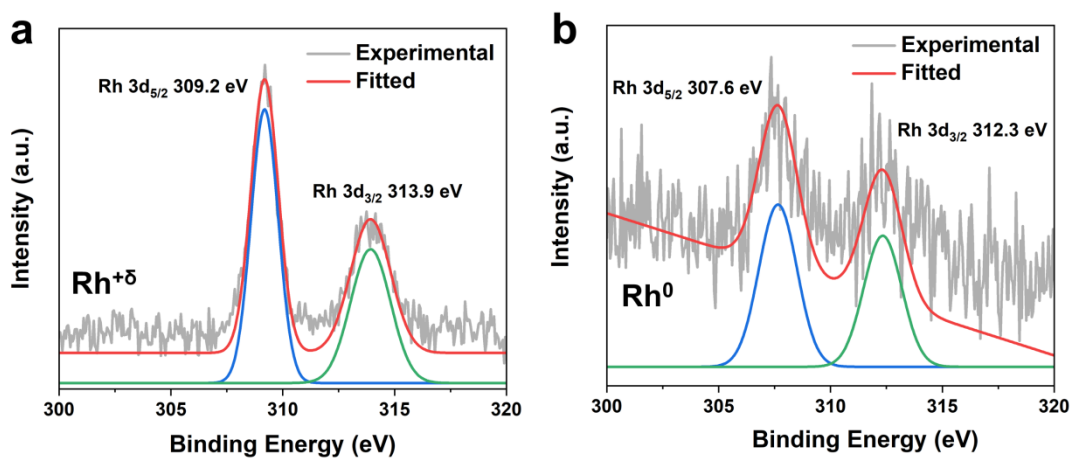

Fig. S12 XPS results of Rh 3d of (a) Rh<sub>1</sub>/BOIO (0 < δ < 3) and (b) Rh<sub>NP</sub>/BOIO.

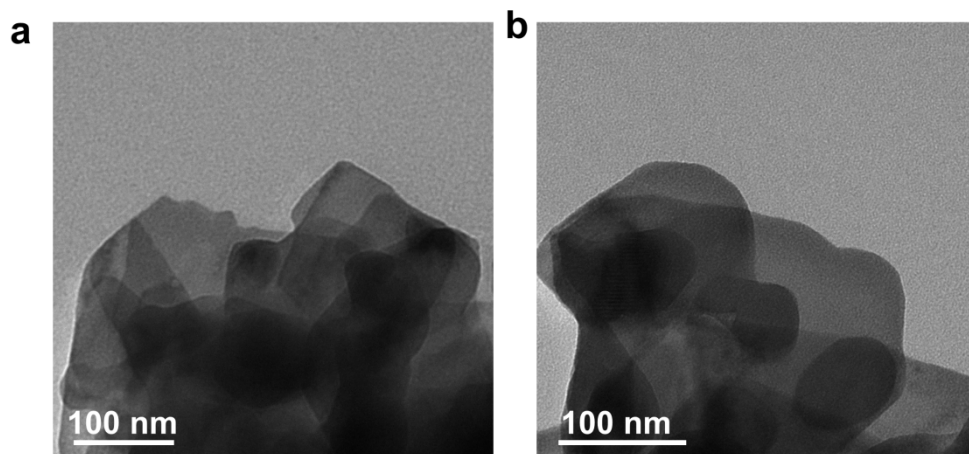

**Fig. S13** TEM images of (a) Rh<sub>1</sub>-0.34wt% and (b) Rh<sub>1</sub>-1.04wt%. Rh<sub>1</sub>-0.34wt% sample was obtained after photo-deposition process between 61  $\mu\text{L}$  RhCl<sub>3</sub>•xH<sub>2</sub>O solution (0.1 g mL<sup>-1</sup>) and 0.3 g BOIO. 183  $\mu\text{L}$  RhCl<sub>3</sub>•xH<sub>2</sub>O solution (0.1 g mL<sup>-1</sup>) was mixed with 0.3 g BOIO to obtain Rh<sub>1</sub>-0.34wt% sample after light irradiation.

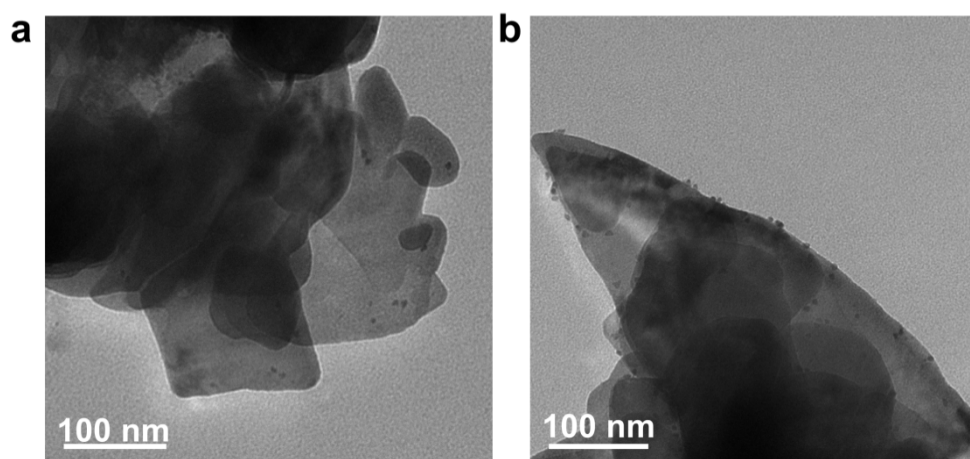

**Fig. S14** TEM images of (a) Rh<sub>NP</sub>-0.35wt% and (b) Rh<sub>NP</sub>-1.04wt%. The samples were obtained via controlling the amount of as-prepared Rh<sub>NP</sub>.



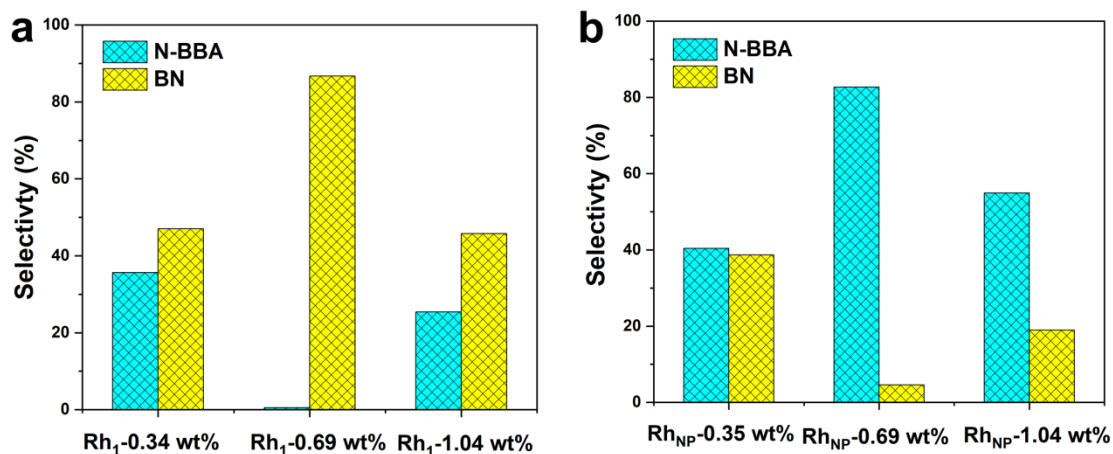

**Fig. S15** (a) The selectivity of N-BBA and BN over different Rh<sub>1</sub> amount on BOIO surface, Rh<sub>1</sub>-0.69 wt% is the Rh<sub>1</sub>/BOIO sample (b) The selectivity of N-BBA and BN over different Rh<sub>NP</sub> amount on BOIO surface, Rh<sub>NP</sub>-0.69 wt% is the Rh<sub>NP</sub>/BOIO sample. The optimized loading amounts of Rh species for Rh<sub>1</sub>/BOIO and Rh<sub>NP</sub>/BOIO have been confirmed.

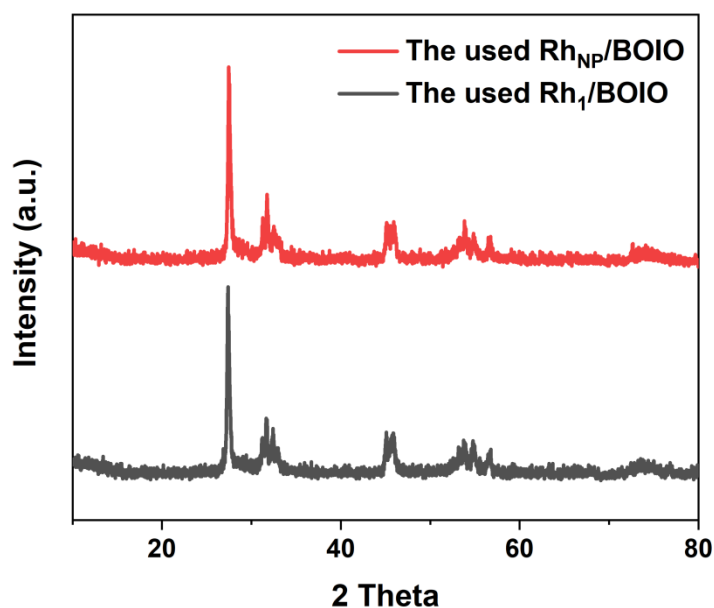

**Fig S16.** The XRD patterns of the used Rh<sub>1</sub>/BOIO and Rh<sub>NP</sub>/BOIO.

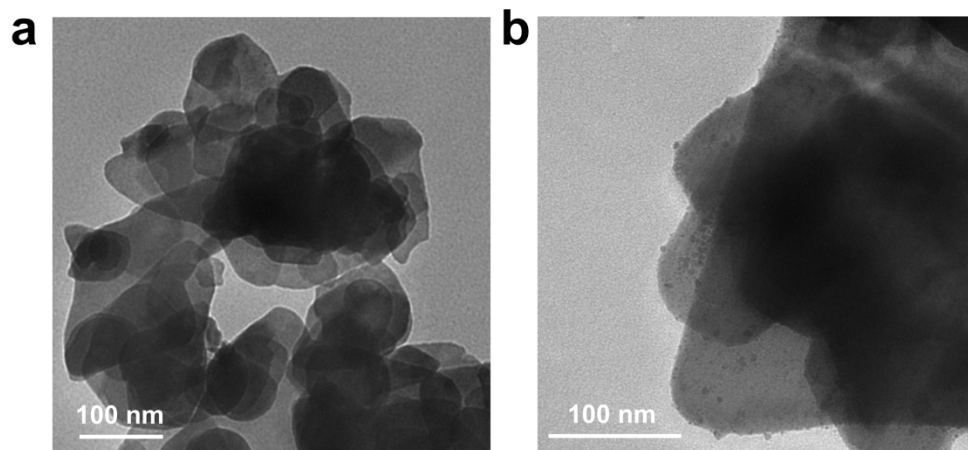

**Fig S17.** The TEM images of the used (a) Rh<sub>1</sub>/BOIO and (b) Rh<sub>NP</sub>/BOIO.

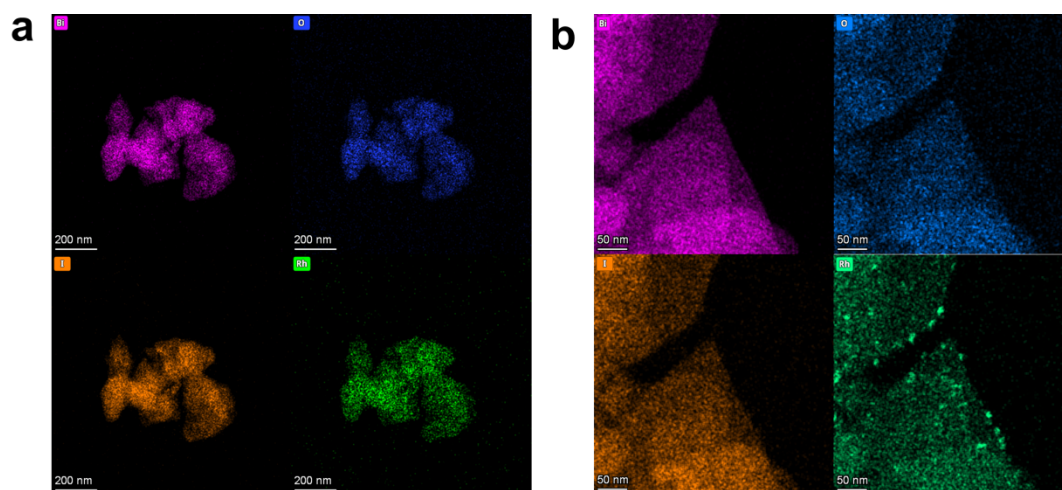

**Fig S18.** The elements mapping images of the used (a) Rh<sub>1</sub>/BOIO and (b) Rh<sub>NP</sub>/BOIO

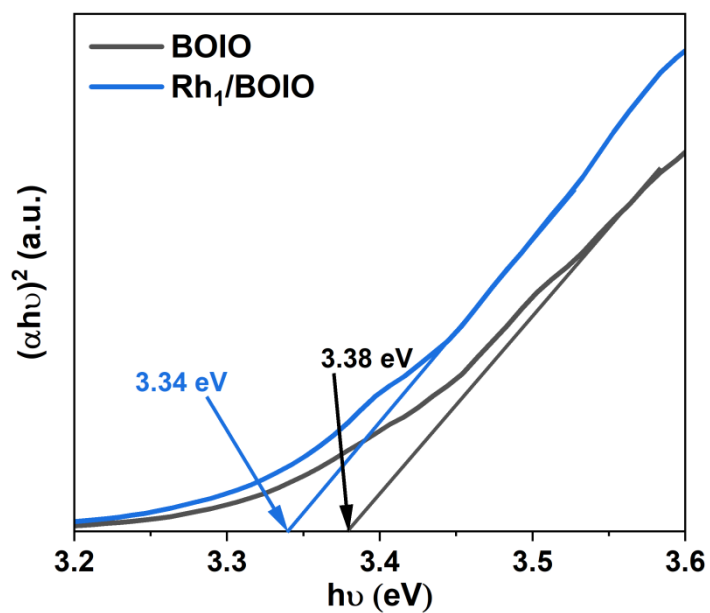

**Fig S19.** The obtained bandgap of samples via Kubelka–Munk function.

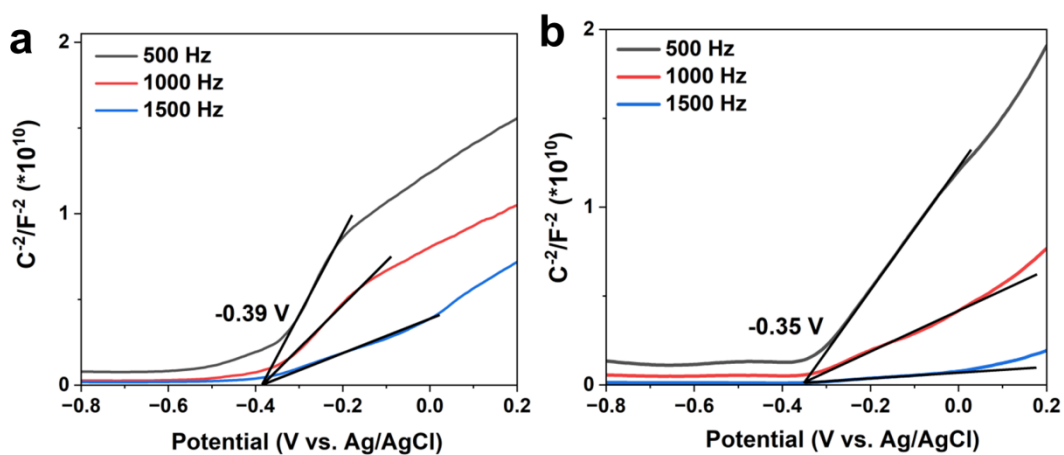

**Fig S20.** Mott-Schottky plots of (a) BOIO and (b)  $\text{Rh}_1/\text{BOIO}$  under different frequency.

The flat band potential obtained by the M-S plots is approximately 0.1 V below their conductor band positions for n-type semiconductors.

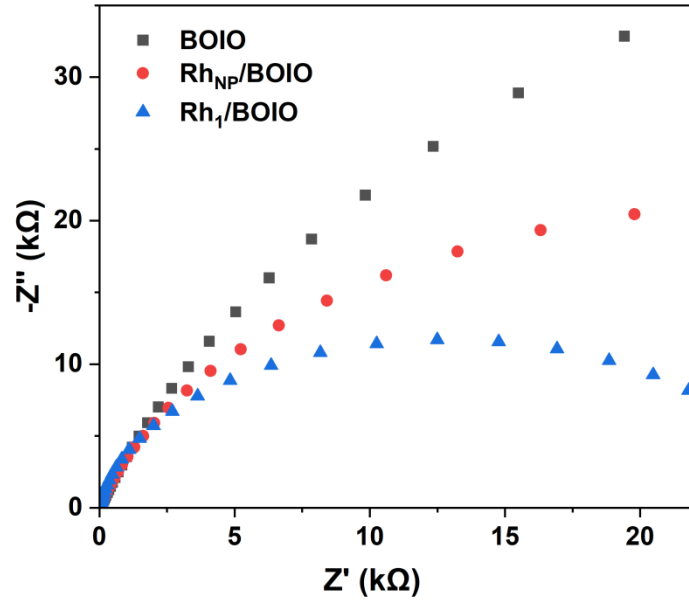

Fig S21. The EIS plots of samples.

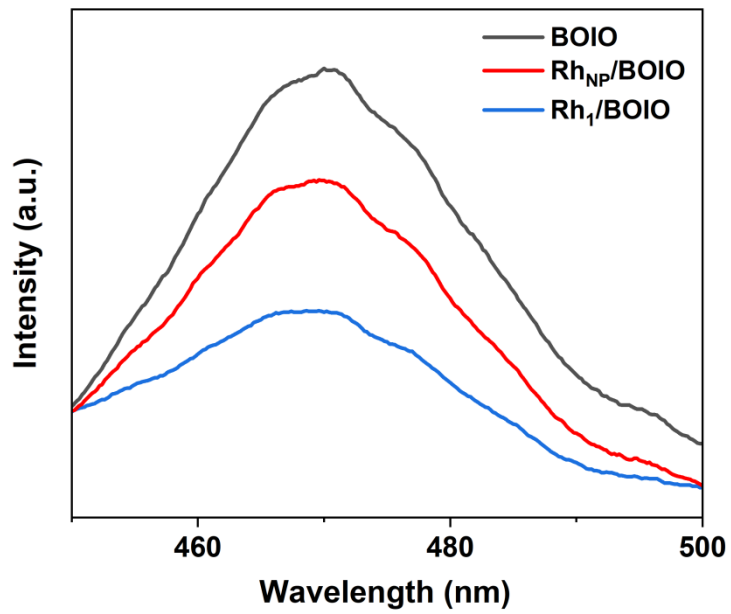

Fig S22. The steady-state PL spectra results of samples.

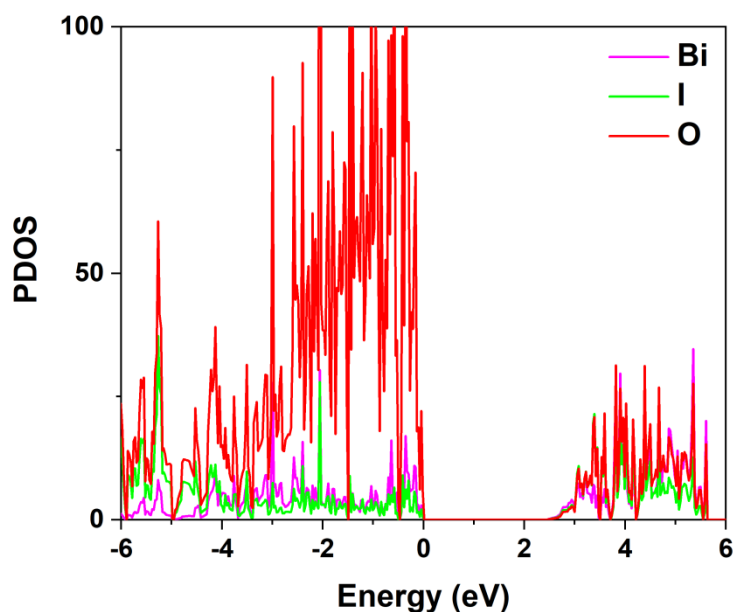

**Fig S23.** The PDOS results of BOIO.

**Table S1.** Structural parameters extracted from the Rh K-edge EXAFS fitting.  
( $S_0^2=0.74$ )

| Sample                | Scattering pair | CN   | R(Å) | $\sigma^2(10^{-3}\text{Å}^2)$ | $\Delta E_0(\text{eV})$ | R factor |
|-----------------------|-----------------|------|------|-------------------------------|-------------------------|----------|
| Rh <sub>1</sub> /BOIO | Rh-O            | 2.32 | 2.03 | 4.13                          | -0.51                   | 0.009    |
| Rh foil               | Rh-Rh           | 12*  | 2.68 | 3.82                          | 4.64                    | 0.014    |

$S_0^2$ , CN and R is the amplitude reduction factor, coordination number and interatomic distance (the bond length between central atoms and surrounding coordination atoms), respectively;  $\sigma^2$  is Debye-Waller factor (a measure of thermal and static disorder in absorber-scatterer distances);  $\Delta E_0$  is edge-energy shift (the difference between the zero kinetic energy value of the sample and that of the theoretical model). R factor is used to value the goodness of the fitting.

\* This value was fixed during EXAFS fitting, based on the known structure.

Error bounds that characterize the structural parameters obtained by EXAFS spectroscopy were estimated as  $N \pm 10\%$ ;  $R \pm 1\%$ ;  $\sigma^2 \pm 15\%$ ;  $\Delta E_0 \pm 20\%$ .

Rh<sub>1</sub>/BOIO (FT range: 2.0-11.1 Å<sup>-1</sup>; fitting range: 1.05-2.0 Å)

Rh foil (FT range: 3.0-14.0 Å<sup>-1</sup>; fitting range: 1.0-2.8 Å)

**Table S2. BA photo-oxidation performances over Rh<sub>1</sub>/BOIO.**

| Photocatalyst                                                      | Product   | Conversion (%) | Selectivity (%) | Reference |
|--------------------------------------------------------------------|-----------|----------------|-----------------|-----------|
| Rh <sub>1</sub> /BOIO                                              | <b>BN</b> | 99.9           | 86.7            | This work |
| RuO <sub>2</sub> /Al <sub>2</sub> O <sub>3</sub>                   |           | 75             | 49              | 1         |
| Ru-K-ZrO <sub>2</sub>                                              |           | 66             | 81              | 2         |
| 3%Ru/AC                                                            |           | 99.9           | 81.7            | 3         |
| [Ru(phen)(PPh <sub>3</sub> ) <sub>2</sub> (CO)(H)]ClO <sub>4</sub> |           | 93             | 82              | 4         |
| RuCl <sub>3</sub>                                                  |           | 100            | 53              | 5         |
| Ru@E-MoS <sub>2</sub>                                              |           | 19             | 99              | 6         |
| [RuCl(bhq)(tpy)] [PF <sub>6</sub> ]                                |           | 74             | —               | 7         |

**Table S3. BA photo-oxidation performances over Rh<sub>NP</sub>/BOIO.**

| Photocatalyst                                           | Product      | Conversion (%) | Selectivity (%) | Reference |
|---------------------------------------------------------|--------------|----------------|-----------------|-----------|
| Rh <sub>NP</sub> /BOIO                                  | <b>N-BBA</b> | 99.9           | 82.8            | This work |
| meso-MoOx-300                                           |              | 77             | 13              | 8         |
| NH <sub>2</sub> -MIL-125(Ti)/amorphous TiO <sub>2</sub> |              | 75             | 73              | 9         |
| TiO <sub>2</sub>                                        |              | 81             | 63              | 10        |
| g-C <sub>3</sub> N <sub>4</sub> /BiOBr                  |              | 63.1           | 87              | 11        |
| WS <sub>2</sub>                                         |              | 85             | 85              | 12        |
| TiO <sub>2</sub> nano-flower-4h                         |              | 99             | 73.3            | 13        |
| UiO-66NH <sub>2</sub> -@Au <sub>0.5</sub> @COF1         |              | 66.9           | 96              | 14        |
| WO <sub>3</sub> /BiOBr                                  |              | 63.8           | 87              | 15        |
| BiOI <sub>0.2</sub> Cl <sub>0.8</sub>                   |              | 77.5           | 96              | 16        |
| Cu catalysts                                            |              | 82.2           | 99              | 17        |

**Table S4.** The average lifetimes of different samples.

| Samples                | $\tau_1$ (ns) | $A_1$    | $\tau_2$ (ns) | $A_2$  | $\tau_{avg}$ (ns) |
|------------------------|---------------|----------|---------------|--------|-------------------|
| BOIO                   | 0.8538        | 228.6940 | 6.8506        | 1.5270 | 1.1587            |
| Rh <sub>NP</sub> /BOIO | 0.8642        | 218.7880 | 4.7132        | 4.0910 | 1.2204            |
| Rh <sub>1</sub> /BOIO  | 0.8817        | 205.5880 | 4.0689        | 7.6420 | 1.3484            |

### References

1. Nordvang, E. C.; Schill, L.; Riisager, A.; Fehrmann, R. Ruthenium Dioxide Catalysts for the Selective Oxidation of Benzylamine to Benzonitrile: Investigating the Effect of Ruthenium Loading on Physical and Catalytic Properties. *Top. Catal.* **2017**, *60*, 1449–1461.
2. Zhu, G.; Shi, S.; Feng, X.; Zhao, L.; Wang, Y.; Cao, J.; Gao, J.; Xu, J. Switching Amine Oxidation from Imines to Nitriles by Carbon-Hydrogen Bond Activation via Strong Base Modified Strategy. *ACS Appl. Mater. Interfaces* **2022**, *14*, 52758–52765.
3. Niu, B.; Lu, F.; Zhang, H.-Y.; Zhang, Y.; Zhao, J. Synthesis of Nitriles from Aerobic Oxidation of Amines Catalyzed by Ruthenium Supported on Activated Carbon. *Chem. Lett.* **2017**, *46*, 330–333.
4. Ray, R.; Chandra, S.; Yadav, V.; Mondal, P.; Maiti, D.; Lahiri, G. K. Ligand controlled switchable selectivity in ruthenium catalyzed aerobic oxidation of primary amines. *Chem. Commun.* **2017**, *53*, 4006–4009.
5. Tang, R.; Diamond, S. E.; Neary, N.; Mares, F., Homogeneous catalytic oxidation of amines and secondary alcohols by molecular oxygen. *J. Chem. Soc., Chem. Commun.* **1978**, 562.
6. Asif Hussain, M.; Yang, M.; Jang, H.-S.; Hwang, S.-Y.; Um, B.-H.; Choi, B. G.; Kim, J. W. Two-Dimensional Heterogeneous Ruthenium–Molybdenum Disulfide Nanocatalyst for the Selective Aerobic Oxidation of Amines. *Ind. Eng. Chem. Res.* **2016**, *55*, 7043–7047.
7. Aiki, S.; Taketoshi, A.; Kuwabara, J.; Koizumi, T.-A.; Kanbara, T., The catalytic activity of a cyclometalated ruthenium(III) complex for aerobic oxidative dehydrogenation of benzylamines. *J. Organomet. Chem.* **2011**, *696*, 1301–1304.

8. Shubhashish, S.; Khanna, H. S.; Achola, L. A.; Amin, A. S.; Willis, W. S.; Suib, S. L. Selective Oxidative Coupling of Amines Using Mesoporous MoO<sub>x</sub> Catalysts. *ACS Appl. Nano Mater.* **2021**, *4*, 2086–2097.
9. Sheng, W.; Huang, F.; Lang, X. NH<sub>2</sub>-MIL-125(Ti)/amorphous TiO<sub>2</sub> microspheres for enhanced visible light photocatalytic selective oxidation of amines. *Mater. Today Chem.* **2023**, *30*, 101505.
10. Li, N.; Lang, X.; Ma, W.; Ji, H.; Chen, C.; Zhao, J., Selective aerobic oxidation of amines to imines by TiO<sub>2</sub> photocatalysis in water. *Chem. Commun.* **2013**, *49*, 5034.
11. Juntrapirom, S.; Anuchai, S.; Thongsook, O.; Pornsuwan, S.; Meepowpan, P.; Thavornytikarn, P.; Phanichphant, S.; Tantraviwat, D.; Inceesungvorn, B., Photocatalytic activity enhancement of g-C<sub>3</sub>N<sub>4</sub>/BiOBr in selective transformation of primary amines to imines and its reaction mechanism. *Chem. Eng. J.* **2020**, *394*, 124934.
12. Raza, F.; Park, J. H.; Lee, H.-R.; Kim, H.-I.; Jeon, S.-J.; Kim, J.-H. Visible-Light-Driven Oxidative Coupling Reactions of Amines by Photoactive WS<sub>2</sub> Nanosheets. *ACS Catal.* **2016**, *6*, 2754–2759.
13. Bu, J.; Fang, J.; Leow, W. R.; Zheng, K.; Chen, X. Single-crystalline rutile TiO<sub>2</sub> nano-flower hierarchical structures for enhanced photocatalytic selective oxidation from amine to imine. *RSC Adv.* **2015**, *5*, 103895–103900.
14. Zhang, K.; Xi, Z.; Wu, Z.; Lu, G.; Huang, X., Visible-Light-Induced Selective Oxidation of Amines into Imines over UiO-66-NH<sub>2</sub>@Au@COF Core-Shell Photocatalysts. *ACS Sustainable Chemistry & Engineering* **2021**, *9*, 12623–12633.
15. Khampuanbut, A.; Santalelat, S.; Pankiew, A.; Channei, D.; Pornsuwan, S.; Faungnawakij, K.; Phanichphant, S.; Inceesungvorn, B. Visible-light-driven WO<sub>3</sub>/BiOBr heterojunction photocatalysts for oxidative coupling of amines to imines: Energy band alignment and mechanistic insight. *J. Colloid Interface Sci.* **2020**, *560*, 213–224.
16. Anuchai, S.; Tantraviwat, D.; Nattestad, A.; Chen, J.; Inceesungvorn, B., Tuning product selectivity and visible-light-driven activity in oxidative coupling of amines to imines: A case study of BiOI<sub>x</sub>Cl<sub>1-x</sub> photocatalyst. *Colloids and Surfaces A: Physicochemical and Engineering Aspects* **2021**, *629*, 127481.
17. Chai, Y.; Zhang, L.; Liu, Q.; Yang, F.; Dai, W.-L. Insights into the Relationship of the Heterojunction Structure and Excellent Activity: Photo-Oxidative Coupling of Benzylamine on CeO<sub>2</sub>-rod/g-C<sub>3</sub>N<sub>4</sub> Hybrid under Mild Reaction Conditions. *ACS. Sustain. Chem. Eng.* **2018**, *6*, 10526–10535.
